# Supplementary material for: Non-Syndromic Hearing Loss in a Romanian Population: Carrier Status and Frequent Variants in the GJB2 Gene
Source: MDPI journal article supplement (doi:10.3390/genes14010069), 2022-12-26
Supplement: s1 [file s1]

**Supplementary Table S1.** Carrier status of variants qualified as likely pathogenic or pathogenic present on the GSA v1 or v3 chips identified in GSA the Romanian cohorts evaluated. The reported numbers reflect heterozygous individuals/allele counts.

| Chr:Pos<br>(GRCh37) | Identifier<br>rs (dbSNPv154)<br>NM (GJB2)                                                            | ClinVar                                           | GSAv1<br>Cluj<br>n=416 | GSAv3<br>Craiova<br>n=472 | AF<br>1000G<br>EUR |
|---------------------|------------------------------------------------------------------------------------------------------|---------------------------------------------------|------------------------|---------------------------|--------------------|
| 13:20763039         | rs111033327<br>NM_004004.6:c.*1C>T                                                                   | Uncertain significance                            | NA                     | 0                         | 0.001              |
| 13:20763071         | rs587783647<br>NM_004004.6:c.647_650del<br>p.Arg216fs                                                | Pathogenic/Likely pathogenic                      | 0                      | 0                         | -                  |
| 13:20763088         | rs587783646<br>NM_004004.6:c.632_633del<br>NM_004004.6:c.632_633delGT<br>p.Cys211fs                  | Pathogenic/Likely pathogenic                      | 0                      | 0                         | -                  |
| 13:20763104         | rs111033294<br>NM_004004.6:c.617A>G<br>p.Asn206Ser                                                   | Pathogenic/Likely pathogenic                      | 0                      | 0                         | -                  |
| 13:20763113         | rs76838169<br>NM_004004.6:c.608T>C<br>p.Ile203Thr                                                    | Benign                                            | 0                      | 0                         | 0                  |
| 13:20763121         | rs111033335<br>NM_004004.6:c.592_600<br>delinsCAGTGTTCATGACATTC<br>p.Val198_Gly200delinsGlnCysSerTer | Pathogenic/Likely pathogenic                      | 0                      | 0                         | -                  |
| 13:20763123         | rs786204597<br>NM_004004.6:c.598G>A<br>p.Gly200Arg<br>NM_004004.6:c.598G>T<br>p.Gly200Ter            | Pathogenic/Likely pathogenic<br>Likely pathogenic | NA<br>NA               | 0<br>0                    | -<br>-             |
| 13:20763170         | rs80338950<br>NM_004004.6:c.551G>A<br>p.Arg184Gln<br>NM_004004.6:c.551G>C<br>p.Arg184Pro             | Pathogenic/Likely pathogenic<br>Pathogenic        | 0<br>0                 | 0<br>0                    | -<br>-             |
| 13:20763186         | rs28931595                                                                                           |                                                   |                        |                           |                    |

|             |                                                    |                              |       |       |   |
|-------------|----------------------------------------------------|------------------------------|-------|-------|---|
|             | NM_004004.6:c.535G>C<br>p.Asp179His                | Uncertain significance       | 0     | 0     | - |
|             | NM_004004.6:c.535G>A<br>p.Asp179Asn                | Pathogenic                   | 0     | 0     | - |
| 13:20763222 | rs111033360<br>NM_004004.6:c.499G>A<br>p.Val167Met | Uncertain significance       | 0     | 0     | 0 |
| 13:20763228 | rs376898963<br>NM_004004.6:c.493C>T<br>p.Arg165Trp | Uncertain significance       | NA    | 0     | 0 |
| 13:20763234 | rs80338949<br>NM_004004.6:c.487A>C<br>p.Met163Leu  | Uncertain significance       | 0     | 0     | - |
|             | NM_004004.6:c.487A>G<br>p.Met163Val                | Uncertain significance       | 2/416 | 0     | 0 |
| 13:20763243 | rs34988750<br>NM_004004.6:c.478G>A<br>p.Gly160Ser  | Uncertain significance       | 1/416 | 1/472 | 0 |
| 13:20763256 | rs772264564<br>NM_004004.6:c.465T>A<br>p.Tyr155Ter | Pathogenic                   | 0     | 0     | - |
| 13:20763265 | rs111033420<br>NM_004004.6:c.456C>T<br>p.Tyr152=   | Likely benign                | 0     | 0     | - |
|             | NM_004004.6:c.456C>A<br>p.Tyr152Ter                | Pathogenic/Likely pathogenic | 0     | 0     | - |
| 13:20763293 | rs104894401<br>NM_004004.6:c.428G>A<br>p.Arg143Gln | Pathogenic/Likely pathogenic | NA    | 0     | - |
| 13:20763294 | rs80338948<br>NM_004004.6:c.427C>T<br>p.Arg143Trp  | Pathogenic                   | 0     | 0     | 0 |
| 13:20763295 | rs397516877<br>NM_004004.6:c.426C>A<br>p.Phe142Leu | Pathogenic                   | 0     | 0     | - |
| 13:20763296 | rs116769964<br>NM_004004.6:c.425T>C<br>p.Phe142Ser | Uncertain significance       | 0     | 0     | 0 |
| 13:20763305 | rs76434661                                         |                              |       |       |   |

|             |                                                       |                              |    |       |       |
|-------------|-------------------------------------------------------|------------------------------|----|-------|-------|
|             | NM_004004.6:c.416G>A<br>p.Ser139Asn                   | Pathogenic                   | 0  | 0     | 0.001 |
| 13:20763313 | rs786204690<br>NM_004004.6:c.408C>A<br>p.Tyr136Ter    | Pathogenic/Likely pathogenic | NA | 0     | -     |
|             | NM_004004.5:c.[134G>A;408C>A]                         | Pathogenic                   | NA | 0     |       |
| 13:20763332 | rs779018464<br>NM_004004.6:c.389G>C<br>p.Gly130Ala    | Likely pathogenic            | NA | 0     | -     |
| 13:20763351 | rs397516874<br>NM_004004.6:c.370C>T<br>p.Gln124Ter    | Pathogenic                   | 0  | 0     | 0     |
| 13:20763356 | rs111033295<br>NM_004004.6:c.365A>T<br>p.Lys122Ile    | Pathogenic/Likely pathogenic | 0  | 0     | -     |
| 13:20763361 | rs80338947<br>NM_004004.6:c.355GAG<br>p.Glu120del     | Pathogenic                   | 0  | 0     | -     |
| 13:20763366 | rs150529554<br>NM_004004.6:c.355G>T<br>p.Glu119Ter    | Pathogenic/Likely pathogenic | NA | 0     | -     |
|             | NM_004004.6:c.355G>A<br>p.Glu119Lys                   | Uncertain significance       | NA | 0     | 0.001 |
| 13:20763371 | rs111033441<br>NM_004004.6:c.350A>G<br>p.Asp117Gly    | Uncertain significance       | 0  | 0     | -     |
| 13:20763380 | rs2274083<br>NM_004004.6:c.341A>G<br>p.Glu114Gly      | Benign                       | NA | 0     | 0     |
|             | NM_004004.5:c.[79G>A;341A>G]                          | Benign/Likely benign         | NA | 0     |       |
| 13:20763382 | rs80338946<br>NM_004004.6:c.339T>G<br>p.Ser113Arg     | Uncertain significance       | NA | 0     | -     |
| 13:20763394 | rs797045596<br>NM_004004.6:c.314_329del<br>p.Lys105fs | Pathogenic                   | 0  | 0     | -     |
| 13:20763395 | rs111033253<br>NM_004004.6:c.313_326del<br>p.Lys105fs | Pathogenic/Likely pathogenic | 0  | 1/472 | -     |

|                    |                                                                          |                              |    |       |   |
|--------------------|--------------------------------------------------------------------------|------------------------------|----|-------|---|
| 13:20763421        | rs111033204<br>NM_004004.6:c.299_300del<br>p.His100fs                    | Pathogenic                   | 0  | 0     | - |
| 13:20763423        | rs143343083<br>NM_004004.6:c.298C>T<br>p.His100Tyr                       | Pathogenic/Likely pathogenic | 0  | 0     | - |
| 13:20763438        | rs111033299<br>NM_004004.6:c.283G>A<br>p.Val95Met                        | Pathogenic/Likely pathogenic | 0  | 0     | 0 |
| <b>13:20763452</b> | <b>rs80338945</b><br><b>NM_004004.6:c.269T&gt;C</b><br><b>p.Leu90Pro</b> | <b>Pathogenic</b>            | NA | 1/472 | - |
| 13:20763471        | rs104894409<br>NM_004004.6:c.250G>T<br>p.Val84Leu                        | Pathogenic                   | NA | 0     | - |
|                    | NM_004004.6:c.250G>A<br>p.Val84Met                                       | Pathogenic                   | NA | 0     | - |
|                    | NM_004004.6:c.250G>C<br>p.Val84Leu                                       | Pathogenic                   | NA | 0     | - |
| 13:20763482        | rs727504302<br>NM_004004.6:c.239A>C<br>p.Gln80Pro                        | Pathogenic/Likely pathogenic | 0  | 0     | - |
| 13:20763486        | rs80338943<br>NM_004004.6:c.235del<br>p.Leu79fs                          | Pathogenic                   | 0  | 0     | 0 |
| 13:20763490        | rs80338944<br>NM_004004.6:c.231G>A<br>p.Trp77Ter                         | Pathogenic                   | 0  | 0     | 0 |
| 13:20763491        | rs104894395<br>NM_004004.6:c.230G>A<br>p.Trp77Ter                        | Pathogenic/Likely pathogenic | NA | 0     | - |
| 13:20763492        | rs104894397<br>NM_004004.6:c.229T>C<br>p.Trp77Arg                        | Pathogenic                   | NA | 0     | - |
| 13:20763494        | rs111033361<br>NM_004004.6:c.227T>C<br>p.Leu76Pro                        | Likely pathogenic            | 0  | 0     | - |
| 13:20763497        | rs28931593<br>NM_004004.6:c.224G>A                                       | Pathogenic                   | 0  | 0     | - |

|             |                               |                              |    |   |   |
|-------------|-------------------------------|------------------------------|----|---|---|
|             | p.Arg75Gln                    |                              |    |   |   |
| 13:20763498 | rs104894402                   |                              |    |   |   |
|             | NM_004004.6:c.223C>G          | Likely pathogenic            | 0  | 0 | - |
|             | p.Arg75Gly                    |                              |    |   |   |
|             | NM_004004.6:c.223C>T          | Pathogenic                   | 0  | 0 | - |
|             | p.Arg75Trp                    |                              |    |   |   |
| 13:20763545 | rs104894404                   |                              |    |   |   |
|             | NM_004004.6:c.176G>A          | Likely pathogenic            | 0  | 0 | - |
|             | p.Gly59Asp                    |                              |    |   |   |
|             | NM_004004.6:c.176G>C          | Pathogenic                   | 0  | 0 | - |
|             | p.Gly59Ala                    |                              |    |   |   |
| 13:20763552 | rs111033297                   |                              |    |   |   |
|             | NM_004004.6:c.169C>T          | Pathogenic                   | 0  | 0 | - |
|             | p.Gln57Ter                    |                              |    |   |   |
| 13:20763554 | rs80338942                    |                              |    |   |   |
|             | NM_004004.6:c.167del          | Pathogenic                   | NA | 0 | - |
|             | p.Leu56fs                     |                              |    |   |   |
| 13:20763563 | rs587783645                   |                              |    |   |   |
|             | NM_004004.6:c.158G>T          | Likely pathogenic            | 0  | 0 | - |
|             | p.Cys53Phe                    |                              |    |   |   |
|             | NM_004004.6:c.158G>A          | Pathogenic                   | 0  | 0 | - |
|             | p.Cys53Tyr                    |                              |    |   |   |
| 13:20763573 | rs28931594                    |                              |    |   |   |
|             | NM_004004.6:c.148G>T          | Pathogenic                   | 0  | 0 | - |
|             | p.Asp50Tyr                    |                              |    |   |   |
|             | NM_004004.6:c.148G>A          | Pathogenic                   | 0  | 0 | - |
|             | p.Asp50Asn                    |                              |    |   |   |
| 13:20763582 | rs104894398                   |                              |    |   |   |
|             | NM_004004.6:c.139G>T          | Pathogenic                   | 0  | 0 | - |
|             | p.Glu47Ter                    |                              |    |   |   |
| 13:20763587 | rs72561723                    |                              |    |   |   |
|             | NM_004004.5:c.[134G>A;408C>A] | Pathogenic                   | 0  | 0 | - |
|             | NM_004004.6:c.134G>A          | Pathogenic/Likely pathogenic |    |   |   |
|             | p.Gly45Glu                    |                              | 0  | 0 |   |
| 13:20763589 | rs104894407                   |                              |    |   |   |
|             | NM_004004.6:c.132G>A          | Pathogenic                   | 0  | 0 | 0 |
|             | p.Trp44Ter                    |                              |    |   |   |
|             | NM_004004.6:c.132G>C          | Pathogenic                   | 0  | 0 | - |
|             | p.Trp44Cys                    |                              |    |   |   |

|             |                                                                                         |                                                |            |            |             |
|-------------|-----------------------------------------------------------------------------------------|------------------------------------------------|------------|------------|-------------|
| 13:20763590 | rs104894413<br>NM_004004.6:c.131G>A<br>p.Trp44Ter<br>NM_004004.6:c.131G>C<br>p.Trp44Ser | Pathogenic/Likely pathogenic<br><br>Pathogenic | 0<br>0     | 0<br>0     | -<br>-      |
| 13:20763601 | rs561870637<br>NM_004004.6:c.120A>C<br>p.Ala40=                                         | Likely benign                                  | NA         | 0          | 0.003       |
| 13:20763602 | rs111033296<br>NM_004004.6:c.119C>G<br>p.Ala40Gly<br>NM_004004.6:c.119C>A<br>p.Ala40Glu | Likely pathogenic<br><br>Likely pathogenic     | 0<br>0     | 0<br>0     | -<br>-      |
| 13:20763612 | rs72474224<br>NM_004004.6:c.109G>T<br>p.Val37Phe<br>NM_004004.6:c.109G>A<br>p.Val37Ile  | Likely pathogenic<br><br>Pathogenic            | 0<br>3/416 | 0<br>1/472 | -<br>0      |
| 13:20763614 | rs587783644<br>NM_004004.6:c.107T>C<br>p.Leu36Pro                                       | Uncertain significance                         | 0          | 0          | -           |
| 13:20763620 | rs35887622<br>NM_004004.6:c.101T>G<br>p.Met34Arg<br>NM_004004.6:c.101T>C<br>p.Met34Thr  | Likely pathogenic<br><br>Pathogenic            | 0<br>5/416 | 0<br>5/472 | -<br>0.0209 |
| 13:20763626 | rs111033190<br>NM_004004.6:c.95G>T<br>p.Arg32Leu<br>NM_004004.6:c.95G>A<br>p.Arg32His   | Pathogenic/Likely pathogenic<br><br>Pathogenic | 0<br>0     | 0<br>0     | -<br>-      |
| 13:20763627 | rs371024165<br>NM_004004.6:c.94C>A<br>p.Arg32Ser<br>NM_004004.6:c.94C>T<br>p.Arg32Cys   | Pathogenic/Likely pathogenic<br><br>Pathogenic | NA<br>NA   | 0<br>0     | -<br>-      |
| 13:20763642 | rs2274084<br>NM_004004.5:c.[79G>A;341A>G]<br>NM_004004.6:c.79G>A                        | Benign/Likely benign<br>Benign                 | 0<br>4/416 | 0<br>7/472 | 0           |

|             |                                                  |                              |       |        |        |
|-------------|--------------------------------------------------|------------------------------|-------|--------|--------|
|             | p.Val27Ile                                       |                              |       |        |        |
| 13:20763650 | rs104894396<br>NM_004004.6:c.71G>A<br>p.Trp24Ter | Pathogenic                   | 2/416 | 0      | 0      |
| 13:20763677 | rs111033217<br>NM_004004.6:c.44A>C<br>p.Lys15Thr | Pathogenic/Likely pathogenic | 0     | 0      | -      |
| 13:20763686 | rs1801002<br>NM_004004.6:c.35G>A<br>p.Gly12Asp   | Uncertain significance       | 0     | 0      | -      |
|             | NM_004004.6:c.35G>T<br>p.Gly12Val                | Pathogenic/Likely pathogenic | 0     | 0      | -      |
| 13:20763686 | rs80338939<br>NM_004004.6:c.35del<br>p.Gly12fs   | Pathogenic                   | NA    | 18/472 | 0.0089 |
|             | NM_004004.6:c.35dup<br>p.Val13fs                 | Pathogenic                   | NA    | 0      | -      |
| 13:20763687 | rs104894408<br>NM_004004.6:c.34G>T<br>p.Gly12Cys | Likely pathogenic            | NA    | 0      | 0      |
|             | NM_004004.6:c.34G>C<br>p.Gly12Arg                | Pathogenic                   | NA    | 0      | -      |
| 13:20763702 | rs111033451<br>NM_004004.6:c.19C>T<br>p.Gln7Ter  | Pathogenic/Likely pathogenic | 0     | 0      | -      |
| 13:20763710 | rs111033222<br>NM_004004.6:c.11G>A<br>p.Gly4Asp  | Likely benign                | NA    | 0      | 0      |
| 13:20763712 | rs111033401<br>NM_004004.6:c.9G>T<br>p.Trp3Cys   | Uncertain significance       | 0     | 0      |        |
|             | NM_004004.6:c.9G>A<br>p.Trp3Ter                  | Pathogenic/Likely pathogenic | 0     | 0      | -      |
| 13:20763720 | rs111033293<br>NM_004004.6:c.1A>T<br>p.Met1Leu   | Likely pathogenic            | 0     | 0      | -      |
|             | NM_004004.6:c.1A>G<br>p.Met1Val                  | Pathogenic                   | 0     | 0      | -      |
| 13:20764940 | rs9552099                                        |                              |       |        |        |

|             |                            |              |       |          |       |
|-------------|----------------------------|--------------|-------|----------|-------|
|             |                            |              |       |          |       |
|             | NM_004004.6):c.-22-1198G>T | not reported | 1/416 | 27+3/472 | -     |
|             | NM_004004.6):c.-22-1198G>A |              | 0     | 0        | 0.828 |
| 13:20766921 | rs80338940                 |              |       |          |       |
|             | NM_004004.6:c.-23+1G>A     | Pathogenic   | 0     | 1/472    | -     |
